# Supplementary material for: External Validation of a Radiomics Model for the Prediction of Complete Response to Neoadjuvant Chemoradiotherapy in Rectal Cancer
Source: MDPI journal article supplement (doi:10.3390/cancers14041079), 2022-02-21
Supplement: s1 [file s1]

## Supplementary Materials

**Table S1 :** MRIs Acquisition parameters

**Table S2 :** Composition of each model and importance of each feature

**Figure S1 :** Example of manually tumor segmentation

**Table S1.** MRIs Acquisition parameters.

| Aquisition parameters           | Siemens 1.5T (institution 1) | Philips 1.5T (institution 1) | Siemens 1.5T (institution 1) | Siemens 1.5T (institution 2) | Philips Achieva 3T (institution 2) | Siemens 1.5T (institution 2) | Siemens 3T (institution 2) |
|---------------------------------|------------------------------|------------------------------|------------------------------|------------------------------|------------------------------------|------------------------------|----------------------------|
| Number of patients              | 20                           | 6                            | 38                           | 25                           | 13                                 | 4                            | 18                         |
| Magnetic field strength (Tesla) | 1.5                          | 1.5                          | 1.5                          | 1.5                          | 3                                  | 1.5                          | 3                          |
| T2-weighted                     |                              |                              |                              |                              |                                    |                              |                            |
| Matrix (pixels)                 | 320 x 320                    | 400 x 55                     | 320 x 320                    | 320 x 320                    | 300 x 256                          | 256 x 256                    | 320 x 320                  |
| Field of view (mm)              | 300 x 300                    | 220 x 220                    | 220 x 220                    | 200 x 200                    | 240 x 240                          | 200 x 200                    | 200 x 200                  |
| ET (ms)                         | 120                          | 100                          | 107                          | 90                           | 90                                 | 77                           | 90                         |
| RT (ms)                         | 5800                         | 10400                        | 6800                         | 5500                         | 4000                               | 4900                         | 5600                       |
| Slice thickness (mm)            | 3                            | 3                            | 3.5                          | 4                            | 3                                  | 3.5                          | 3                          |
| Diffusion                       |                              |                              |                              |                              |                                    |                              |                            |
| Matrix (pixels)                 | 128 x 108                    | 116 x 118                    | 126 x 126                    | 128 x 160                    | 116 x 116                          | 154 x 103                    | 160 x 120                  |
| Fields of view (mm)             | 249 x 249                    | 240 x 240                    | 249 x 249                    | 200 x 200                    | 240 x 240                          | 249 x 249                    | 240 x 240                  |
| ET (ms)                         | 75                           | 80                           | 88                           | 72                           | 74                                 | 83                           | 60                         |
| RT (ms)                         | 7000                         | 2500                         | 3500                         | 4200                         | 4800                               | 4700                         | 4200                       |

|                      |              |       |              |         |         |         |            |
|----------------------|--------------|-------|--------------|---------|---------|---------|------------|
| Slice thickness (mm) | 4            | 3     | 5            | 4       | 4       | 4       | 4          |
| Gradient             | B50-400-1000 | B1000 | B50-800-1000 | B50-800 | B0-1000 | B50-800 | B0-400-800 |

Abbreviations: T: Tesla, mm: milimeters, ms: milisecond, ET: Echo-Time, RT: Repetition Time

**Table S2.** Composition of each model and importance of each feature.

| Model           | Feature               | Importance (%) |
|-----------------|-----------------------|----------------|
| Clinical        | Tumour grade          | 9.5            |
|                 | Tumour stage          | 90.5           |
| Radiomic        | HGLRE_align_Diffusion | 1.9            |
|                 | Entropy_Hist_T2       | 14.1           |
|                 | Elongation_T2         | 21.4           |
|                 | Elongation_Diffusion  | 26.3           |
|                 | Energy_Hist_T2        | 36.3           |
| Combined        | HGLRE_align_Diffusion | 0.7            |
|                 | Tumour grade          | 2.6            |
|                 | Elongation_T2         | 6.7            |
|                 | Elongation_Diffusion  | 11.2           |
|                 | Entropy_Hist_T2       | 12.3           |
|                 | Energy_Hist_T2        | 19.6           |
|                 | Tumour stage          | 47.0           |
| Combat_Radiomic | Elongation_Diffusion  | 0.2            |
|                 | Mean_Hist_T2          | 1.0            |
|                 | GLNU_norm_align_T2    | 5.4            |
|                 | StandardDeviation_T2  | 7.6            |
|                 | Energy_Hist_T2        | 11.0           |
|                 | HGLZE_Diffusion       | 16.1           |
|                 | Variance_Hist_T2      | 58.7           |
| Combat_Combined | Mean_Hist_T2          | 1.1            |
|                 | GLNU_norm_align_T2    | 1.6            |
|                 | Energy_Hist_T2        | 4.2            |

|  |                      |      |
|--|----------------------|------|
|  | Elongation_Diffusion | 7.0  |
|  | HGLZE_Diffusion      | 7.9  |
|  | StandardDeviation_T2 | 10.5 |
|  | Tumour stage         | 27.5 |
|  | Variance_Hist_T2     | 40.3 |

Abbreviations: HGLRE: High Gray Level Run Emphasis, T2: T2-weighted sequence, Hist: Histogram, GLNU: Grey-Level Non-Uniformity, HGLZE: High Gray Level Zone Emphasis

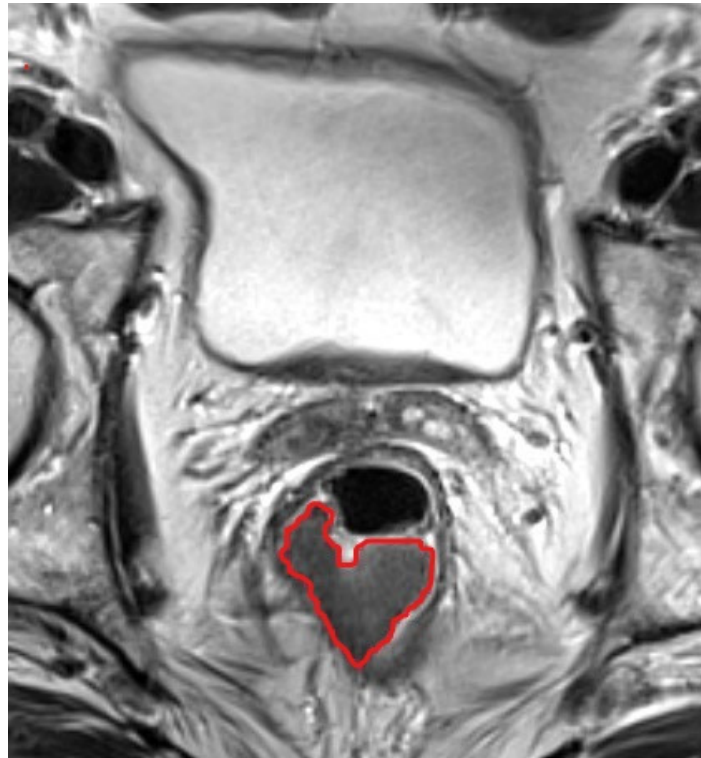

**Figure S1 :** Example of manually tumor segmentation.
